# Supplementary material for: The Reaction of Hydrogen Halides with Tetrahydroborate Anion and Hexahydro-closo-hexaborate Dianion
Source: MDPI journal article supplement (doi:10.3390/molecules26123754), 2021-06-20
Supplement: s1 [file s1]

# Reaction of Hydrogen Halides with Tetrahydroborate Anion and Hexahydro-*closo*-hexaborate Dianion

Igor E. Golub\*, Oleg A. Filippov, Natalia V. Belkova, Lina M. Epstein, and Elena S. Shubina\*

A. N. Nesmeyanov Institute of Organoelement Compounds, Russian Academy of Sciences  
(INEOS RAS), 28 Vavilova St, 119991 Moscow, Russia; h-bond@ineos.ac.ru (O.A.F.); nataliabelk@ineos.ac.ru (N.V.B.);  
epst@ineos.ac.ru (L.M.E.)

\* Correspondence: seraph347@gmail.com (I.E.G.); shu@ineos.ac.ru (E.S.S.)

## Supplementary Materials

**Table S1.** M06-computed geometric parameters (distances  $r_{(X-Y)}$  in Å, angles in °) of dihydrogen-bonded (DHB) complexes (INTn<sup>DHB</sup>) of  $[BH_{(4-x)}X_x]^-$  ( $x = 0-3$ ) with HX ( $X = F, Cl, Br$ ), their formation energy ( $\Delta G_f^{\circ MeCN}$  and  $\Delta H_f^{\circ MeCN}$  in kcal/mol), electron densities in (+3;-1) critical point of H...H bond ( $\rho_c$  in au), Laplacian of electron density at critical point ( $\nabla^2\rho_c$  in au), bond ellipticity ( $\epsilon$ ), energy of H...H interaction ( $E_{H...H} = 0.5 \cdot V(r)[1, 2]$  in kcal/mol) and donation energy ( $E^2$  in kcal/mol) from  $\sigma(B-H)$  to  $\sigma^*(H-X)$  estimated from 2<sup>nd</sup>-order perturbative analysis of donor acceptor interactions within natural-bond orbital (NBO) analysis. **S3**

**Table S2.** M06-computed geometric parameters (distances  $r_{(X-Y)}$  in Å, angles in °) of H<sub>2</sub> complexes of  $X^-[(H_2)BH_{(4-x)}X_x]^-$  ( $n = 1-2$ ,  $X = Cl, Br$ ) (INTn<sup>H2</sup>), their formation energy ( $\Delta G_f^{\circ MeCN}$  and  $\Delta H_f^{\circ MeCN}$  in kcal/mol), donation energy ( $E_2$  in kcal/mol) from  $\sigma(B-H/X)$  to  $\sigma^*(H-H-B)$  ( $E_1$ ), from  $\sigma(H-H-B)$  to  $\sigma^*(B-H/X)$  ( $E_2$ ) and from  $p(X)$  to  $\sigma^*(H-H-B)$  ( $E_3$ ) estimated from 2<sup>nd</sup>-order perturbative analysis of donor acceptor interactions within natural-bond orbital (NBO) analysis, QTAIM energy of H<sub>2</sub>...H, H...H and B...H interactions ( $E_{X...Y} = 0.5 \cdot V(r)[1, 2]$  in kcal/mol). **S3**

**Table S3.** Hydride affinity (HA<sub>298K</sub> in kcal/mol) of  $[BH_{(4-x)}X_x]^-$  ( $x = 0-3$ ) ( $X = F, Cl, Br$ ). Hybridization of boron orbitals in B-H moieties, QTAIM delocalization indices (DI) of BH bond in  $[BH_{(4-x)}X_x]^-$  ( $X = F, Cl, Br$ ). Hydride (HDA<sub>MeCN</sub> in kcal/mol) and proton (PDA<sub>MeCN</sub> in kcal/mol) donor abilities for Li[BH<sub>(4-x)</sub>X<sub>x</sub>] in MeCN. **S4**

**Table S4.** QTAIM delocalization indices (DI) and Wiberg bond indices (WBI) for H...H contacts, their differences for XH and HB bond and hybridization of boron orbitals in BH moieties of M06-computed geometries of DHB complexes for  $[BH_{(4-x)}X_x]^-$  ( $x = 0-3$ ) with HX ( $X = F, Cl, Br$ ) (INTn<sup>DHB</sup>). **S4**

**Figure S1.** M06-calculated energy profile ( $\Delta G^{\circ MeCN}$  in kcal/mol) of the reaction of BH<sub>4</sub><sup>-</sup> with HF in MeCN. **S5**

**Figure S2.** wB97XD-calculated energy profile ( $\Delta G^{\circ MeCN}$  in kcal/mol) of the reaction of BH<sub>4</sub><sup>-</sup> with HF in MeCN. **S5**

**Figure S3.** wB97XD-calculated energy profile ( $\Delta G^{\circ MeCN}$  in kcal/mol) of the reaction of BH<sub>4</sub><sup>-</sup> with HCl in MeCN. **S6**

**Figure S4.** M06-calculated energy profile ( $\Delta G^{\circ MeCN}$  in kcal/mol) of the reaction of BH<sub>4</sub><sup>-</sup> with HBr in MeCN. **S7**

**Figure S5.** wB97XD-calculated energy profile ( $\Delta G^{\circ MeCN}$  in kcal/mol) of the reaction of BH<sub>4</sub><sup>-</sup> with HBr in MeCN. **S7**

**Table S5.** Free Gibbs activation energy in acetonitrile ( $\Delta G^{\circ MeCN \ddagger}$  in kcal/mol) of the transition state of H<sub>2</sub> elimination (TSn<sup>ELIM<sub>HX</sub></sup>) and concerted transition state of proton-hydride transfer/H<sub>2</sub> elimination (TSn<sup>CONC<sub>HX</sub></sup>) for reaction of BH<sub>4</sub><sup>-</sup> with HX ( $X = F, Cl, Br$ ) and their M06-optimized geometric parameters. **S8**

**Table S6.** Free Gibbs activation energy in acetonitrile ( $\Delta G^{\circ MeCN \ddagger}$  in kcal/mol) of the transition state of H<sub>2</sub> elimination (TSn<sup>ELIM<sub>HX</sub></sup>) and concerted transition state of proton-hydride transfer/H<sub>2</sub> elimination (TSn<sup>CONC<sub>HX</sub></sup>) for reaction of BH<sub>4</sub><sup>-</sup> with HX ( $X = F, Cl, Br$ ) and their wB97XD-optimized geometric parameters. **S8**

**Table S7.** Free Gibbs activation energy in dichloromethane ( $\Delta G^{\circ}_{\text{DCM}}^{\ddagger}$  in kcal/mol)[5] of the concerted transition state of proton-hydride transfer/ $\text{H}_2$  elimination ( $\text{TS}^{\text{CONC}}_{\text{ROH}}$ ) for reaction of  $\text{BH}_4^-$  with HOR [ $\text{ROH} = \text{MeOH}$ ,  $\text{CF}_3\text{CH}_2\text{OH}$  (TFE),  $(\text{CF}_3)_2\text{CHOH}$  (HFIP)] and their M06-optimized geometric parameters. S10

**Table S8.** Hydride ( $\text{HDA}_{\text{MeCN}}$  in kcal/mol) and proton ( $\text{PDA}_{\text{MeCN}}$  in kcal/mol) donor abilities for  $[\text{B}_6\text{H}_{(6-x)}\text{Cl}_x]^{2-}$  ( $x = 0-5$ ) in MeCN. S10

**Table S9.** M06-computed geometric (distances  $r_{(X-Y)}$  in Å, angles in degrees) parameters of hydrogen-bonded complexes of  $[\text{B}_6\text{H}_{(6-x)}\text{Cl}_x]^{2-}$  ( $x = 0-5$ ) with HCl ( $\text{INTn}^{\text{HB}}$ ), their formation energy ( $\Delta G_f^{\circ}_{\text{MeCN}}$  and  $\Delta H_f^{\circ}_{\text{MeCN}}$  in kcal/mol), electron densities at the  $\text{H}\cdots\text{B}(\text{B}2)$  bond (+3;-1) critical point ( $q_c$  in au), Laplacian of electron density at critical point ( $\nabla^2 q_c$  in au), bond ellipticity ( $\epsilon$ ) and energy of  $\text{H}\cdots\text{B}(\text{B}2)$  interaction ( $E_{\text{H}\cdots\text{B}(\text{B}2)} = 0.5 \cdot V(r)$  [1, 2] in kcal/mol) and donation energy ( $E^2_{\text{HB}}$  in kcal/mol) from  $\sigma(\text{B}-\text{B})$  to  $\sigma^*(\text{H}-\text{Cl})$  estimated from 2nd-order perturbative analysis of donor acceptor interactions within natural-bond orbital (NBO) analysis. S11

**Table S10.** M06-computed geometric (distances  $r_{(X-Y)}$  in Å, angles in degrees) parameters of hydrogen bonded complexes of  $\text{Cl}^- \cdot [\text{facHB}_6\text{H}_{(6-x)}\text{Cl}_x]^-$  ( $x = 0-5$ ) with HCl, their formation energy ( $\Delta G_f^{\circ}_{\text{MeCN}}$  and  $\Delta H_f^{\circ}_{\text{MeCN}}$  in kcal/mol), electron densities at the  $\text{H}\cdots\text{B}(\text{B}2)$  bond (+3;-1) critical point ( $q_c$  in au), Laplacian of electron density at critical point ( $\nabla^2 q_c$  in au), bond ellipticity ( $\epsilon$ ) and energy of  $\text{H}\cdots\text{B}(\text{B}2)$  interaction ( $E_{\text{H}\cdots\text{B}(\text{B}2)} = 0.5 \cdot V(r)$  [1, 2] in kcal/mol). S11

**Table S11.** M06-computed geometric parameters (distances  $r_{(X-Y)}$  in Å, angles in °) of  $\text{H}_2$  complexes of  $\text{Cl}^- \cdot (\text{H}_2)\text{B}_6\text{H}_{(5-x)}\text{Cl}_x]^-$  ( $x = 0-5$ ) ( $\text{INTn}^{\text{H}_2}$ ), their formation energy ( $\Delta G_f^{\circ}_{\text{MeCN}}$  and  $\Delta H_f^{\circ}_{\text{MeCN}}$  in kcal/mol), electron densities in (+3;-1) donation energy ( $E^2$  in kcal/mol) from  $\sigma(\text{B}-\text{H}/\text{Cl})$  to  $\sigma^*(\text{H}-\text{H}-\text{B})$  ( $E^2_1$ ), from  $\sigma(\text{H}-\text{H}-\text{B})$  to  $\sigma^*(\text{B}-\text{H}/\text{Cl})$  ( $E^2_2$ ) and from  $p(\text{Cl})$  to  $\sigma^*(\text{H}-\text{H}-\text{B})$  ( $E^2_3$ ) estimated from 2<sup>nd</sup>-order perturbative analysis of donor acceptor interactions within natural-bond orbital (NBO) analysis. S12

**Figure S6.** M06-optimized geometries of the protonated forms  $[\text{facHB}_6\text{H}_{(6-x)}\text{Cl}_x]^-$  ( $x = 0-4$ ) and their free Gibbs formation energies ( $\Delta G_f^{\circ}_{\text{MeCN}}$  in kcal/mol). S13

**Figure S7.** wB97XD-calculated energy profile of halogenation of  $[\text{B}_6\text{H}_{(6-x)}\text{Cl}_x]^{2-}$  ( $x = 0-5$ ) by HCl for the pathway:  $[\text{B}_6\text{H}_6]^{2-} \rightarrow 1-[\text{B}_6\text{H}_5\text{Cl}]^{2-} \rightarrow 1,2-[\text{B}_6\text{H}_4\text{Cl}_2]^{2-}$  (*cis*)  $\rightarrow 1,2,3-[\text{B}_6\text{H}_3\text{Cl}_3]^{2-}$  (*fac*)  $\rightarrow 1,2,3,4-[\text{B}_6\text{H}_2\text{Cl}_4]^{2-}$  (*cis*)  $\rightarrow 1,2,3,4,6-[\text{B}_6\text{HCl}_5]^{2-}$ . S14

**Table S12.** Activation barriers ( $\Delta G^{\circ}_{\text{MeCN}}^{\ddagger}$ , in kcal/mol) for TSs for the reaction of  $[\text{B}_6\text{xH}_6]^{2-}$  with HCl ( $\text{pK}_a^{\text{MeCN}} = 10.3$ ) in MeCN computed at the wB97XD/6-311++G(d,p) theory level. S15

**References** S16

**Table S1.** M06-computed geometric parameters (distances  $r_{(X-Y)}$  in Å, angles in °) of dihydrogen-bonded (DHB) complexes ( $\text{INT}^{\text{DHB}}$ ) of  $[\text{BH}_{(4-x)}\text{X}_x]^-$  ( $x = 0-3$ ) with  $\text{HX}$  ( $X = \text{F}, \text{Cl}, \text{Br}$ ), their formation energy ( $\Delta G_f^\circ_{\text{MeCN}}$  and  $\Delta H_f^\circ_{\text{MeCN}}$  in kcal/mol), electron densities in (+3;-1) critical point of  $\text{H}\cdots\text{H}$  bond ( $\rho_c$  in au), Laplacian of electron density at critical point ( $\nabla^2\rho_c$  in au), bond ellipticity ( $\epsilon$ ), energy of  $\text{H}\cdots\text{H}$  interaction ( $E_{\text{H}\cdots\text{H}} = 0.5 \cdot V(r)$  [1, 2] in kcal/mol) and donation energy ( $E^2$  in kcal/mol) from  $\sigma(\text{B-H})$  to  $\sigma^*(\text{H-X})$  estimated from 2<sup>nd</sup>-order perturbative analysis of donor acceptor interactions within natural-bond orbital (NBO) analysis.

| DHB complex                             | $r_{(\text{H}_X\cdots\text{H}_B)}$ | $r_{(\text{XH})}$ | $\Delta r_{(\text{XH})}$ | $\angle_{\text{XH}\cdots\text{H}}$ | $r_{(\text{HB})}$ | $\Delta r_{(\text{HB})}$ | $\angle_{\text{H}\cdots\text{HB}}$ | $\Delta G_f^\circ_{\text{MeCN}}$ | $\Delta H_f^\circ_{\text{MeCN}}$ | $\rho_c$ | $\nabla^2\rho_c$ | $\epsilon$ | $E_{\text{H}\cdots\text{H}}$ | $E^2$ |
|-----------------------------------------|------------------------------------|-------------------|--------------------------|------------------------------------|-------------------|--------------------------|------------------------------------|----------------------------------|----------------------------------|----------|------------------|------------|------------------------------|-------|
| $\text{H}_3\text{BH}\cdots\text{HF}$    | 1.499                              | 0.951             | 0.027                    | 159                                | 1.235             | -0.002                   | 100                                | 2.7                              | -4.9                             | 0.036    | 0.072            | 0.25       | -8.0                         | 16.1  |
|                                         | 1.974                              |                   |                          | 131                                | 1.223             | -0.014                   | 79                                 |                                  |                                  |          |                  |            |                              | 2.8   |
| $\text{FH}_2\text{BH}\cdots\text{HF}$   | 1.440                              | 0.950             | 0.026                    | 172                                | 1.243             | 0.005                    | 105                                | 2.6                              | -4.3                             | 0.039    | 0.074            | 0.13       | -9.2                         | 19.2  |
| $\text{F}_2\text{HBH}\cdots\text{HF}$   | 1.425                              | 0.948             | 0.024                    | 179                                | 1.245             | 0.008                    | 111                                | 4.5                              | -3.7                             | 0.039    | 0.082            | 0.08       | -9.2                         | 18.6  |
| $\text{F}_3\text{BH}\cdots\text{HF}$    | 1.469                              | 0.942             | 0.018                    | 179                                | 1.236             | -0.001                   | 113                                | 5.1                              | -2.5                             | 0.034    | 0.075            | 0.08       | -7.6                         | 15.7  |
| $\text{H}_3\text{BH}\cdots\text{HCl}$   | 1.580                              | 1.324             | 0.031                    | 172                                | 1.236             | -0.001                   | 103                                | 3.4                              | -4.2                             | 0.031    | 0.064            | 0.13       | -5.6                         | 15.5  |
| $\text{ClH}_2\text{BH}\cdots\text{HCl}$ | 1.641                              | 1.315             | 0.021                    | 171                                | 1.220             | -0.017                   | 106                                | 3.8                              | -3.7                             | 0.026    | 0.061            | 0.16       | -4.4                         | 10.6  |
| $\text{Cl}_2\text{HBH}\cdots\text{HCl}$ | 1.656                              | 1.308             | 0.014                    | 174                                | 1.209             | -0.028                   | 117                                | 4.4                              | -3.4                             | 0.023    | 0.058            | 0.10       | -3.7                         | 7.3   |
| $\text{Cl}_3\text{BH}\cdots\text{HCl}$  | 1.715                              | 1.305             | 0.011                    | 178                                | 1.201             | -0.037                   | 118                                | 5.1                              | -2.5                             | 0.020    | 0.052            | 0.09       | -3.0                         | 5.0   |
| $\text{H}_3\text{BH}\cdots\text{HBr}$   | 1.726                              | 1.452             | 0.024                    | 169                                | 1.234             | -0.004                   | 103                                | 3.6                              | -3.7                             | 0.023    | 0.053            | 0.15       | -3.5                         | 9.5   |
| $\text{BrH}_2\text{BH}\cdots\text{HBr}$ | 1.797                              | 1.444             | 0.017                    | 165                                | 1.217             | -0.020                   | 104                                | 3.9                              | -3.6                             | 0.020    | 0.048            | 0.19       | -2.9                         | 6.2   |
| $\text{Br}_2\text{HBH}\cdots\text{HBr}$ | 1.840                              | 1.439             | 0.011                    | 160                                | 1.204             | -0.033                   | 113                                | 4.4                              | -3.0                             | 0.017    | 0.043            | 0.13       | -2.4                         | 3.6   |
| $\text{Br}_3\text{BH}\cdots\text{HBr}$  | 1.850                              | 1.437             | 0.009                    | 163                                | 1.196             | -0.041                   | 115                                | 4.2                              | -3.0                             | 0.016    | 0.041            | 0.02       | -2.2                         | 3.0   |

**Table S2.** M06-computed geometric parameters (distances  $r_{(X-Y)}$  in Å, angles in °) of  $\eta^2\text{-H}_2$  complexes of  $\text{X}^-[(\text{H}_2)\text{BH}_{(4-x)}\text{X}_x]^-$  ( $x = 1-2$ ,  $X = \text{Cl}, \text{Br}$ ) ( $\text{INTn}^{\text{H}_2}$ ), their formation energy ( $\Delta G_f^\circ_{\text{MeCN}}$  and  $\Delta H_f^\circ_{\text{MeCN}}$  in kcal/mol), donation energy ( $E_2$  in kcal/mol) from  $\sigma(\text{B-H/X})$  to  $\sigma^*(\text{H-H-B})$  ( $E^1_1$ ), from  $\sigma(\text{H-H-B})$  to  $\sigma^*(\text{B-H/X})$  ( $E^2_2$ ) and from  $p(X)$  to  $\sigma^*(\text{H-H-B})$  ( $E^2_3$ ) estimated from 2<sup>nd</sup>-order perturbative analysis of donor acceptor interactions within natural-bond orbital (NBO) analysis, QTAIM energy of  $\text{H}_2\cdots\text{H}$ ,  $\text{H}\cdots\text{H}$  and  $\text{B}\cdots\text{H}$  interactions ( $E_{X\cdots Y} = 0.5 \cdot V(r)$  [1, 2] in kcal/mol).

| $\eta^2\text{-H}_2$<br>complex                | $r_{(\text{H}\cdots\text{H})}$ | $r_{(\text{B}\cdots\text{H}_1)}$ | $\Delta r_{(\text{B}\cdots\text{H}_1)}$ | $r_{(\text{B}\cdots\text{H}_2)}$ | $r_{(\text{B}\cdots\text{H}_2)}$ | $\Delta r_{(\text{B}\cdots\text{H}_2)}$ | $r_{(\text{H}_2\cdots\text{X})}$ | $\Delta r_{(\text{H}_2\cdots\text{X})}$ | $\Delta G_f^\circ_{\text{MeCN}}$ | $\Delta H_f^\circ_{\text{MeCN}}$ | $E^1_1$ | $E^2_2$ | $E^2_3$ | $E_{\text{H}_2\cdots\text{X}}$ | $E_{\text{H}\cdots\text{H}}$ | $E_{\text{B}\cdots\text{H}}$ |
|-----------------------------------------------|--------------------------------|----------------------------------|-----------------------------------------|----------------------------------|----------------------------------|-----------------------------------------|----------------------------------|-----------------------------------------|----------------------------------|----------------------------------|---------|---------|---------|--------------------------------|------------------------------|------------------------------|
| $\text{Cl}^-(\text{H}_2)\text{BH}_3$          | 0.841                          | 1.351                            | 0.124                                   | 1.327                            | 1.432                            | 0.205                                   | 2.272                            | 0.978                                   | 3.8                              | -3.7                             | 13.3    | 3.7     | 15.7    | -3.9                           | -63.8                        | -64.9                        |
|                                               |                                |                                  |                                         |                                  |                                  |                                         |                                  |                                         |                                  |                                  | 2.9     | 1.1     | 1.2     |                                |                              |                              |
|                                               |                                |                                  |                                         |                                  |                                  |                                         |                                  |                                         |                                  |                                  | 2.3     | 1.3     |         |                                |                              |                              |
| $\text{Br}^-(\text{H}_2)\text{BH}_3$          | 0.846                          | 1.343                            | 0.116                                   | 1.340                            | 1.464                            | 0.237                                   | 2.302                            | 1.008                                   | 8.0                              | 0.2                              | 12.0    | 4.2     | 23.7    | -4.6                           | -63.1                        | -64.4                        |
|                                               |                                |                                  |                                         |                                  |                                  |                                         |                                  |                                         |                                  |                                  | 2.1     | 1.4     | 2.1     |                                |                              |                              |
|                                               |                                |                                  |                                         |                                  |                                  |                                         |                                  |                                         |                                  |                                  | 2.0     | 1.4     |         |                                |                              |                              |
| $\text{Cl}^-(\text{H}_2)\text{BH}_2\text{Cl}$ | 0.853                          | 1.342                            | 0.115                                   | 1.363                            | 1.508                            | 0.281                                   | 2.042                            | 0.748                                   | 11.7                             | 3.0                              | 8.8     | 11.5    | 38.1    | -8.0                           | -61.7                        | -63.3                        |
|                                               |                                |                                  |                                         |                                  |                                  |                                         |                                  |                                         |                                  |                                  | 7.9     | 5.1     | 3.3     |                                |                              |                              |
|                                               |                                |                                  |                                         |                                  |                                  |                                         |                                  |                                         |                                  |                                  | 4.6     | 3.3     | 1.5     |                                |                              |                              |

**Table S3.** Hydride affinity ( $HA_{298K}$  in kcal/mol) of  $[BH_{(4-x)}X_x]^-$  ( $x = 0-3$ ) ( $X = F, Cl, Br$ ). Hybridization of boron orbitals in B–H moieties, QTAIM delocalization indices (DI) of BH bond in  $[BH_{(4-x)}X_x]^-$  ( $X = F, Cl, Br$ ). Hydride ( $HDA_{MeCN}$  in kcal/mol) and proton ( $PDA_{MeCN}$  in kcal/mol) donor abilities for  $Li[BH_{(4-x)}X_x]$  in MeCN.

| Molecule           | $HA_{298K}^a$ | Molecule                                        | ( $sp^N$ ) B–H | DI (BH) | Molecule                             | $HDA_{MeCN}^b$ | $PDA_{MeCN}$ |
|--------------------|---------------|-------------------------------------------------|----------------|---------|--------------------------------------|----------------|--------------|
| BH <sub>3</sub>    | 73.7          | BH <sub>4</sub> <sup>−</sup>                    | 3.0            | 0.537   | LiBH <sub>4</sub>                    | 64.86          | 96.51        |
| FBH <sub>2</sub>   | 63.2          | [BH <sub>3</sub> F] <sup>−</sup>                | 2.7            | 0.503   | Li[BH <sub>3</sub> F]                | 54.64          | 104.37       |
| F <sub>2</sub> BH  | 60.0          | [BH <sub>2</sub> F <sub>2</sub> ] <sup>−</sup>  | 2.5            | 0.468   | Li[BH <sub>2</sub> F <sub>2</sub> ]  | 53.12          | 107.48       |
| F <sub>3</sub> B   | 70.5          | [F <sub>3</sub> BH] <sup>−</sup>                | 2.1            | 0.442   | Li[BHF <sub>3</sub> ]                | 61.08          | 101.22       |
| ClBH <sub>2</sub>  | 80.9          | [BH <sub>3</sub> Cl] <sup>−</sup>               | 2.6            | 0.544   | Li[BH <sub>3</sub> Cl]               | 65.34          | 88.23        |
| Cl <sub>2</sub> BH | 88.1          | [BH <sub>2</sub> Cl <sub>2</sub> ] <sup>−</sup> | 2.4            | 0.548   | Li[BH <sub>2</sub> Cl <sub>2</sub> ] | 69.80          | 93.85        |
| Cl <sub>3</sub> B  | 95.8          | [BHCl <sub>3</sub> ] <sup>−</sup>               | 2.2            | 0.552   | Li[BHCl <sub>3</sub> ]               | 73.02          | 85.49        |
| BrBH <sub>2</sub>  | 87.3          | [BH <sub>3</sub> Br] <sup>−</sup>               | 2.6            | 0.553   | Li[BH <sub>3</sub> Br]               | 69.47          | 88.97        |
| Br <sub>2</sub> BH | 97.3          | [BH <sub>2</sub> Br <sub>2</sub> ] <sup>−</sup> | 2.4            | 0.571   | Li[BH <sub>2</sub> Br <sub>2</sub> ] | 74.67          | 88.81        |
| Br <sub>3</sub> B  | 104.9         | [BHBr <sub>3</sub> ] <sup>−</sup>               | 2.0            | 0.592   | Li[BHBr <sub>3</sub> ]               | 77.60          | 83.47        |

<sup>a</sup> Calculated values are taken from [3]. <sup>b</sup> Calculated values are taken from [4].

**Table S4.** QTAIM delocalization indices (DI) and Wiberg bond indices (WBI) for  $H\cdots H$  contacts, their differences for  $XH$  and  $HB$  bond and hybridization of boron orbitals in BH moieties of M06-computed geometries of DHB complexes for  $[BH_{(4-x)}X_x]^-$  ( $x = 0-3$ ) with  $HX$  ( $X = F, Cl, Br$ ) ( $INT^{DHB}$ ).

| DHB complex                      | $DI_{(XH\cdots HB)}$ | $\Delta DI_{(XH)}$ | $\Delta DI_{(HB)}$ | $WBI_{(XH\cdots HB)}$ | $\Delta WBI_{(XH)}$ | $\Delta WBI_{(HB)}$ | H–B( $sp^N$ ) |
|----------------------------------|----------------------|--------------------|--------------------|-----------------------|---------------------|---------------------|---------------|
| H <sub>3</sub> BH $\cdots$ HF    | 0.082                | −0.060             | −0.046             | 0.078                 | −0.164              | −0.098              | 3.2           |
|                                  | 0.022                |                    | −0.009             | 0.009                 |                     | −0.010              | 3.0           |
| FH <sub>2</sub> BH $\cdots$ HF   | 0.095                | −0.057             | −0.053             | 0.105                 | −0.142              | −0.133              | 3.0           |
| F <sub>2</sub> HBH $\cdots$ HF   | 0.097                | −0.052             | −0.052             | 0.057                 | −0.120              | −0.143              | 2.7           |
| F <sub>3</sub> BH $\cdots$ HF    | 0.087                | −0.045             | −0.046             | 0.102                 | −0.093              | −0.124              | 2.3           |
| H <sub>3</sub> BH $\cdots$ HCl   | 0.111                | −0.161             | −0.047             | 0.079                 | −0.161              | −0.119              | 3.2           |
| ClH <sub>2</sub> BH $\cdots$ HCl | 0.094                | −0.131             | −0.038             | 0.057                 | −0.110              | −0.087              | 2.8           |
| Cl <sub>2</sub> HBH $\cdots$ HCl | 0.084                | −0.104             | −0.036             | 0.044                 | −0.068              | −0.071              | 2.5           |
| Cl <sub>3</sub> BH $\cdots$ HCl  | 0.074                | −0.083             | −0.032             | 0.033                 | −0.046              | −0.051              | 2.3           |
| H <sub>3</sub> BH $\cdots$ HBr   | 0.094                | −0.145             | −0.034             | 0.049                 | −0.124              | −0.080              | 3.1           |
| BrH <sub>2</sub> BH $\cdots$ HBr | 0.077                | −0.122             | −0.028             | 0.032                 | −0.087              | −0.055              | 2.7           |
| Br <sub>2</sub> HBH $\cdots$ HBr | 0.064                | −0.100             | −0.024             | 0.021                 | −0.054              | −0.039              | 2.5           |
| Br <sub>3</sub> BH $\cdots$ HBr  | 0.063                | −0.089             | −0.025             | 0.018                 | −0.047              | −0.033              | 2.3           |

Figure S1. M06-calculated energy profile ( $\Delta G^\circ_{\text{MeCN}}$  in kcal/mol) of the reaction of  $\text{BH}_4^-$  with HF in MeCN.

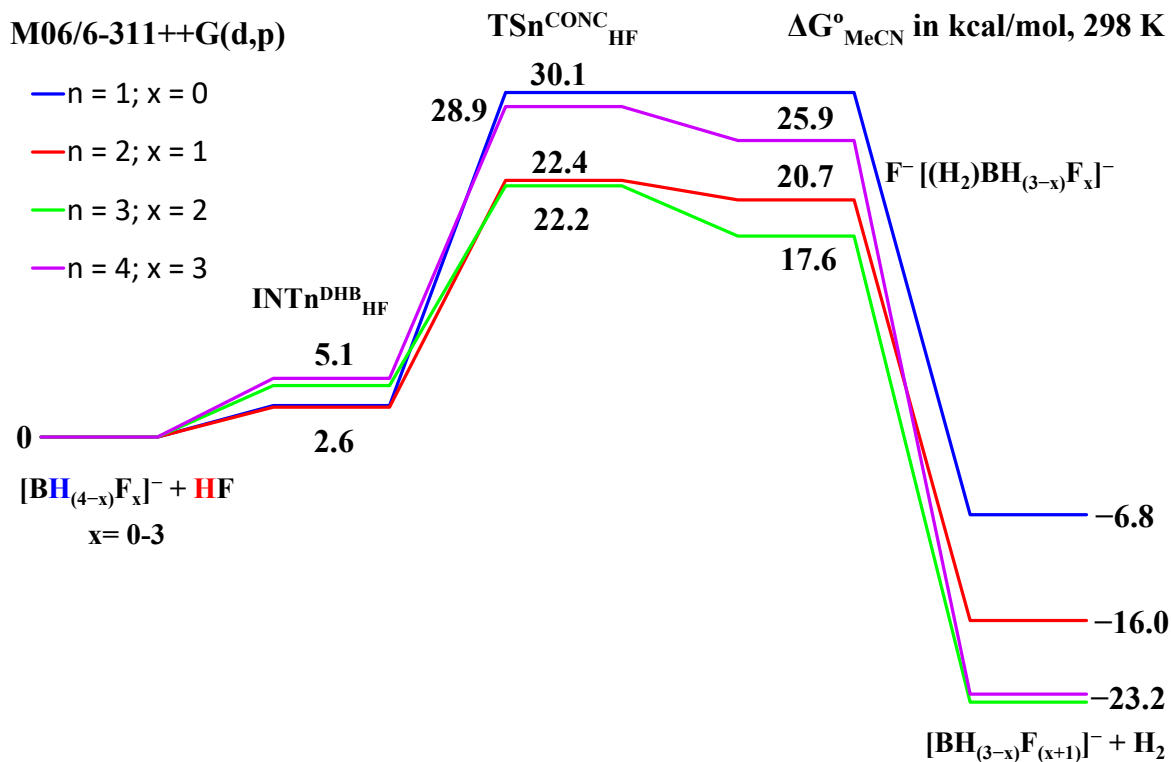

Figure S2. wB97XD-calculated energy profile ( $\Delta G^\circ_{\text{MeCN}}$  in kcal/mol) of the reaction of  $\text{BH}_4^-$  with HF in MeCN.

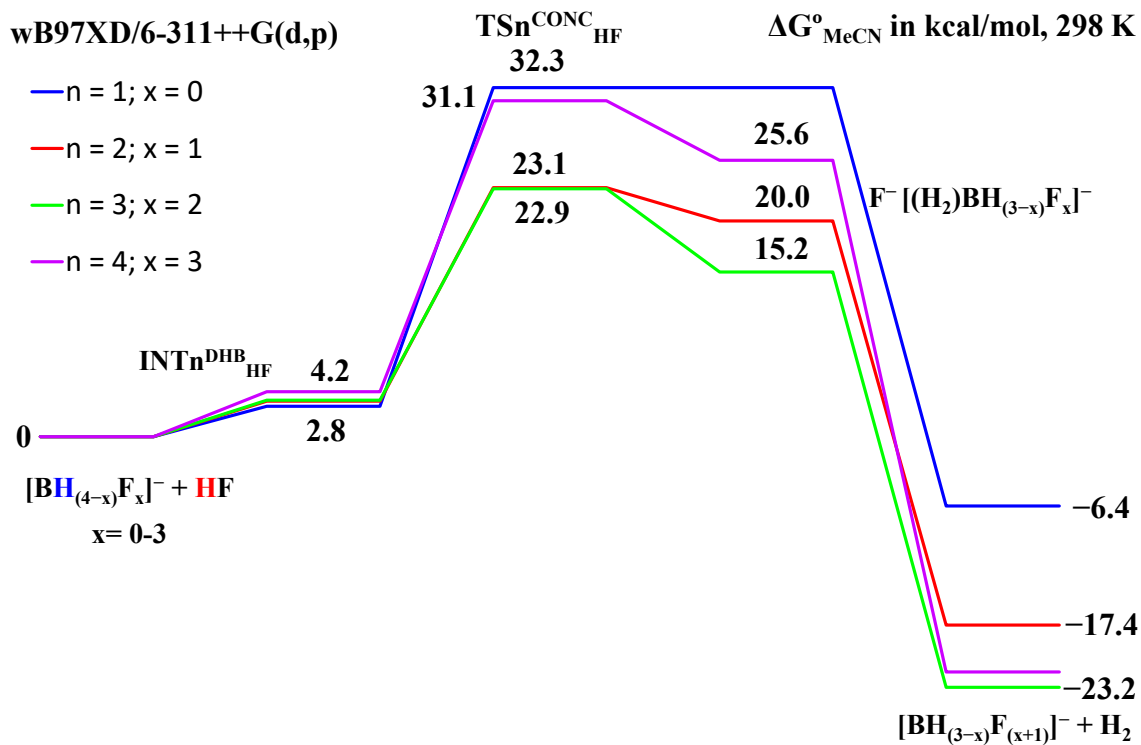

Figure S3. wB97XD-calculated energy profile ( $\Delta G^\circ_{\text{MeCN}}$  in kcal/mol) of the reaction of  $\text{BH}_4^-$  with  $\text{HCl}$  in  $\text{MeCN}$ .

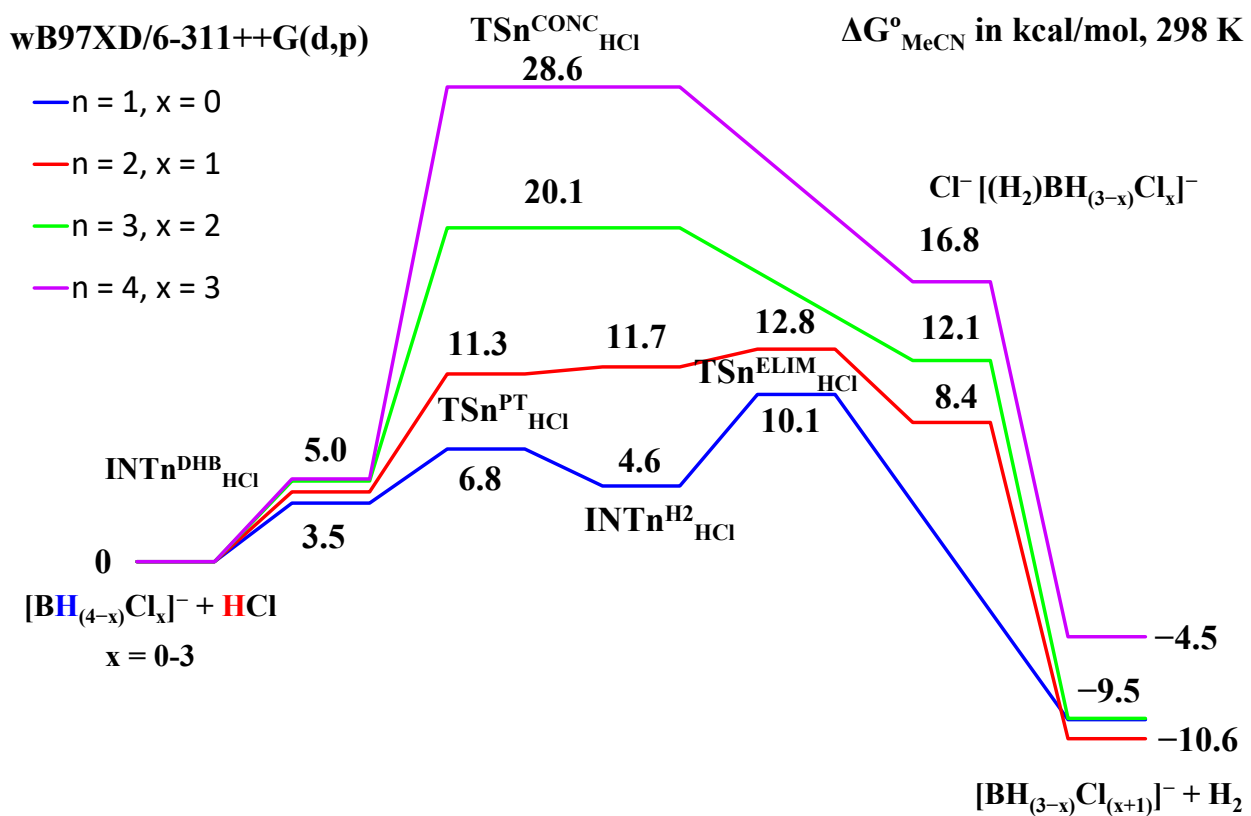

Figure S4. M06-calculated energy profile ( $\Delta G^\circ_{\text{MeCN}}$  in kcal/mol) of the reaction of  $\text{BH}_4^-$  with  $\text{HBr}$  in MeCN.

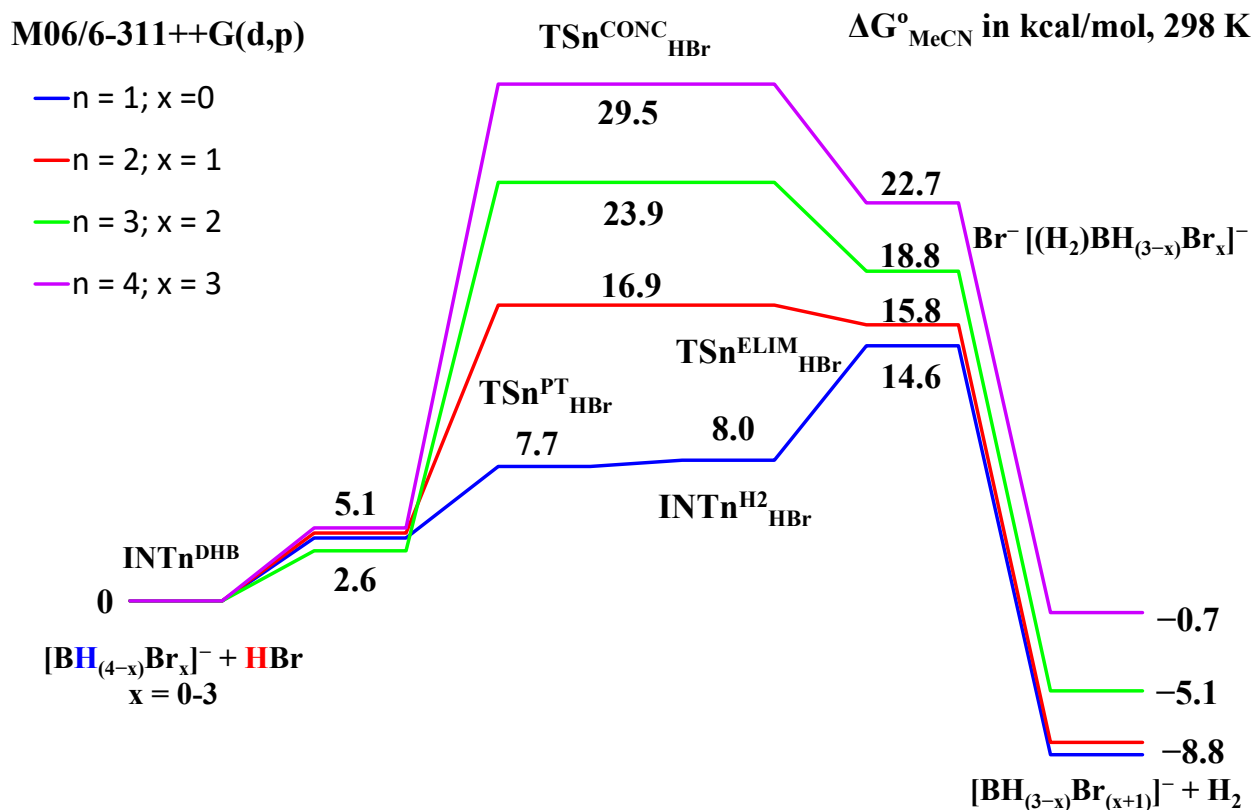

Figure S5. wB97XD-calculated energy profile ( $\Delta G^\circ_{\text{MeCN}}$  in kcal/mol) of the reaction of  $\text{BH}_4^-$  with  $\text{HBr}$  in MeCN.

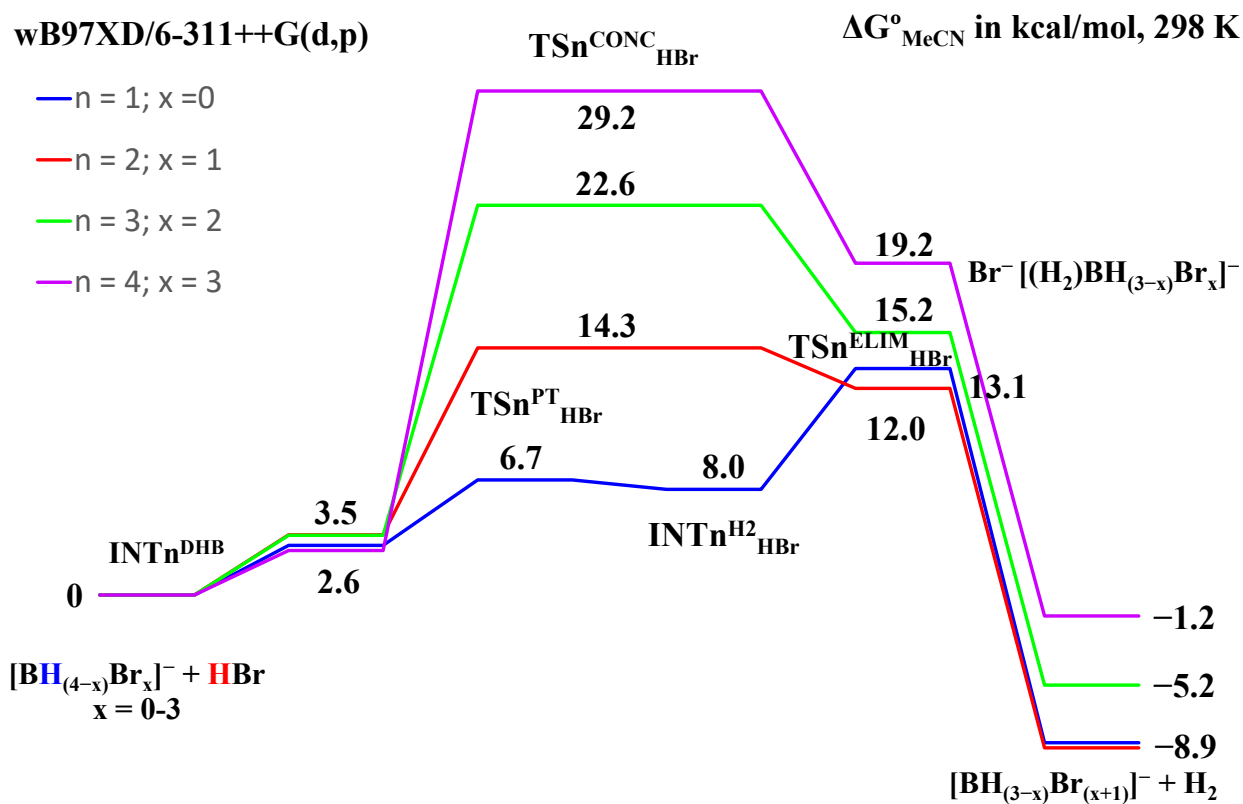

**Table S5.** Free Gibbs activation energy in MeCN ( $\Delta G^{\circ}_{\text{MeCN}}{}^{\ddagger(\text{span})}$  in kcal/mol) of the transition state of H<sub>2</sub> elimination (**TSn<sup>ELIM</sup><sub>HX</sub>**) and concerted transition state of proton-hydride transfer/H<sub>2</sub> elimination (**TSn<sup>CONC</sup><sub>HX</sub>**) for reaction of BH<sub>4</sub><sup>−</sup> with HX (X = F, Cl, Br) and their M06-optimized geometric parameters (distances  $r_{(\text{X}-\text{Y})}$  in Å).

| <b>M06 TS</b>                      | $\Delta G^{\circ}_{\text{MeCN}}{}^{\ddagger(\text{span})}$ | $r(\text{B}\cdots\text{H}_2)$ | $r(\text{H}-\text{H})$ | $r(\text{H}\cdots\text{X})$ | $r(\text{B}\cdots\text{X})$ |
|------------------------------------|------------------------------------------------------------|-------------------------------|------------------------|-----------------------------|-----------------------------|
| TS1 <sup>CONC</sup> <sub>HF</sub>  | 30.1                                                       | 2.452                         | 0.760                  | 2.030                       | 2.969                       |
| TS2 <sup>CONC</sup> <sub>HF</sub>  | 22.4                                                       | 1.940                         | 0.781                  | 1.818                       | 3.335                       |
| TS3 <sup>CONC</sup> <sub>HF</sub>  | 22.0                                                       | 1.895                         | 0.806                  | 1.595                       | 3.304                       |
| TS4 <sup>CONC</sup> <sub>HF</sub>  | 28.9                                                       | 1.926                         | 0.799                  | 1.627                       | 3.306                       |
| TS1 <sup>ELIM</sup> <sub>HCl</sub> | 9.1                                                        | 2.631                         | 0.755                  | 2.661                       | 3.528                       |
| TS2 <sup>ELIM</sup> <sub>HCl</sub> | 12.9                                                       | 1.861                         | 0.773                  | 2.460                       | 3.945                       |
| TS3 <sup>CON</sup> <sub>HCl</sub>  | 19.2                                                       | 1.825                         | 0.789                  | 2.195                       | 3.913                       |
| TS4 <sup>CONC</sup> <sub>HCl</sub> | 26.1                                                       | 1.902                         | 0.796                  | 2.086                       | 3.956                       |
| TS1 <sup>ELIM</sup> <sub>HBr</sub> | 14.6                                                       | 2.528                         | 0.758                  | 2.741                       | 3.725                       |
| TS2 <sup>CONC</sup> <sub>HBr</sub> | 16.9                                                       | 2.004                         | 0.772                  | 2.563                       | 4.231                       |
| TS3 <sup>CONC</sup> <sub>HBr</sub> | 23.9                                                       | 2.008                         | 0.789                  | 2.303                       | 4.282                       |
| TS4 <sup>CONC</sup> <sub>HBr</sub> | 29.5                                                       | 1.837                         | 0.795                  | 2.226                       | 4.355                       |

**Table S6.** Free Gibbs activation energy in MeCN ( $\Delta G^{\circ}_{\text{MeCN}}{}^{\ddagger(\text{span})}$  in kcal/mol) of the transition states of H<sub>2</sub> elimination (**TSn<sup>ELIM</sup><sub>HX</sub>**) and concerted transition state of proton-hydride transfer/H<sub>2</sub> elimination (**TSn<sup>CONC</sup><sub>HX</sub>**) for reaction of BH<sub>4</sub><sup>−</sup> with HX (X = F, Cl, Br) and their wB97XD-optimized geometric parameters (distances  $r_{(\text{X}-\text{Y})}$  in Å).

| <b>wB97XD TS</b>                   | $\Delta G^{\circ}_{\text{MeCN}}{}^{\ddagger(\text{span})}$ | $r(\text{B}\cdots\text{H}_2)$ | $r(\text{H}-\text{H})$ | $r(\text{H}\cdots\text{X})$ | $r(\text{B}\cdots\text{X})$ |
|------------------------------------|------------------------------------------------------------|-------------------------------|------------------------|-----------------------------|-----------------------------|
| TS1 <sup>CONC</sup> <sub>HF</sub>  | 32.3                                                       | 2.647                         | 0.756                  | 2.079                       | 3.164                       |
| TS2 <sup>CONC</sup> <sub>HF</sub>  | 23.1                                                       | 1.993                         | 0.773                  | 1.864                       | 3.500                       |
| TS3 <sup>CONC</sup> <sub>HF</sub>  | 22.9                                                       | 1.870                         | 0.798                  | 1.611                       | 3.326                       |
| TS4 <sup>CONC</sup> <sub>HF</sub>  | 31.1                                                       | 1.921                         | 0.789                  | 1.665                       | 3.350                       |
| TS1 <sup>ELIM</sup> <sub>HCl</sub> | 10.1                                                       | 2.882                         | 0.749                  | 2.845                       | 3.784                       |
| TS2 <sup>ELIM</sup> <sub>HCl</sub> | 12.8                                                       | 1.933                         | 0.763                  | 2.641                       | 4.140                       |
| TS3 <sup>CONC</sup> <sub>HCl</sub> | 20.1                                                       | 1.798                         | 0.776                  | 2.327                       | 4.020                       |
| TS4 <sup>CONC</sup> <sub>HCl</sub> | 28.6                                                       | 1.859                         | 0.785                  | 2.147                       | 3.960                       |
| TS1 <sup>ELIM</sup> <sub>HBr</sub> | 13.1                                                       | 2.684                         | 0.752                  | 2.834                       | 3.935                       |
| TS2 <sup>CONC</sup> <sub>HBr</sub> | 14.3                                                       | 2.049                         | 0.763                  | 2.682                       | 4.299                       |
| TS3 <sup>CONC</sup> <sub>HBr</sub> | 22.6                                                       | 1.955                         | 0.777                  | 2.391                       | 4.295                       |
| TS4 <sup>CONC</sup> <sub>HBr</sub> | 29.2                                                       | 2.042                         | 0.786                  | 2.257                       | 4.355                       |



**Table S7.** Free Gibbs activation energy in dichloromethane ( $\Delta G^{\circ}_{\text{DCM}}^{\ddagger}$  in kcal/mol)[5] of the concerted transition state of proton-hydride transfer/ $\text{H}_2$  elimination ( $\text{TS}^{\text{CONC}}_{\text{ROH}}$ ) for reaction of  $\text{BH}_4^-$  with HOR [ $\text{ROH} = \text{MeOH}$ ,  $\text{CF}_3\text{CH}_2\text{OH}$  (TFE),  $(\text{CF}_3)_2\text{CHOH}$  (HFIP)] and their M06-optimized geometric parameters.

| Name of TS                               | $\Delta G^{\circ}_{\text{DCM}}^{\ddagger}$ | $r(\text{B}\cdots\text{H}_2)$ | $r(\text{H}\cdots\text{H})$ | $r(\text{H}\cdots\text{O})$ | $r(\text{B}\cdots\text{O})$ |
|------------------------------------------|--------------------------------------------|-------------------------------|-----------------------------|-----------------------------|-----------------------------|
| $\text{TS1}^{\text{CONC}}_{\text{MeOH}}$ | 53.3                                       | 2.125                         | 0.828                       | 1.565                       | 2.646                       |
| $\text{TS2}^{\text{CONC}}_{\text{MeOH}}$ | 30.1                                       | 2.335                         | 0.810                       | 1.692                       | 3.539                       |
| $\text{TS3}^{\text{CONC}}_{\text{MeOH}}$ | 21.9                                       | 2.134                         | 0.883                       | 1.400                       | 3.462                       |
| $\text{TS4}^{\text{CONC}}_{\text{MeOH}}$ | 18.8                                       | 2.260                         | 0.930                       | 1.312                       | 3.541                       |
| $\text{TS1}^{\text{CONC}}_{\text{TFE}}$  | 44.5                                       | 2.183                         | 0.789                       | 1.788                       | 2.800                       |
| $\text{TS2}^{\text{CONC}}_{\text{TFE}}$  | 26.1                                       | 2.012                         | 0.815                       | 1.652                       | 3.240                       |
| $\text{TS3}^{\text{CONC}}_{\text{TFE}}$  | 24.3                                       | 1.951                         | 0.863                       | 1.436                       | 3.268                       |
| $\text{TS4}^{\text{CONC}}_{\text{TFE}}$  | 21.6                                       | 2.026                         | 0.899                       | 1.349                       | 3.258                       |
| $\text{TS1}^{\text{CONC}}_{\text{HFIP}}$ | 35.1                                       | 2.233                         | 0.744                       | 1.924                       | 2.847                       |
| $\text{TS2}^{\text{CONC}}_{\text{HFIP}}$ | 21.3                                       | 2.291                         | 0.788                       | 1.799                       | 3.246                       |
| $\text{TS3}^{\text{CONC}}_{\text{HFIP}}$ | 16.7 <sup>a</sup>                          | 1.912                         | 0.859                       | 1.440                       | 3.270                       |

<sup>a</sup> This value was calculated for the model reaction of  $[(\text{CF}_3)_2\text{CHO}][(\text{CF}_3)(\text{CH}_3)\text{CHO}]\text{BH}_2^-$  with  $(\text{CF}_3)_2\text{CHOH}$  (HFIP)

**Table S8.** Hydride ( $\text{HDA}_{\text{MeCN}}$  in kcal/mol) and proton ( $\text{PDA}_{\text{MeCN}}$  in kcal/mol) donor abilities for  $[\text{B}_6\text{H}_{(6-x)}\text{Cl}_x]^{2-}$  ( $x = 0\text{--}5$ ) in MeCN.

|                            | Molecule                                 | $\text{HDA}_{\text{MeCN}}$                                      | $\text{PDA}_{\text{MeCN}}$                                       |
|----------------------------|------------------------------------------|-----------------------------------------------------------------|------------------------------------------------------------------|
|                            | $[\text{B}_6\text{H}_6]^{2-}$            | 71.94                                                           | 106.58                                                           |
| [1]                        | $[\text{B}_6\text{ClH}_5]^{2-}$          | $\text{BH}_{\text{eq}}$ 76.55 $\text{BH}_{\text{ax}}$ 80.01     | $\text{BH}_{\text{eq}}$ 103.11 $\text{BH}_{\text{ax}}$ 102.41    |
| [1,2] ( <i>cis</i> )       | $[\text{B}_6\text{Cl}_2\text{H}_4]^{2-}$ | $\text{BH}_{\text{cis}}$ 80.97 $\text{BH}_{\text{trans}}$ 84.67 | $\text{BH}_{\text{cis}}$ 100.42 $\text{BH}_{\text{trans}}$ 99.70 |
| [1,6] ( <i>trans</i> )     | $[\text{B}_6\text{Cl}_2\text{H}_4]^{2-}$ | 81.06                                                           | 100.05                                                           |
| [1,2,3] ( <i>fac</i> )     | $[\text{B}_6\text{Cl}_3\text{H}_3]^{2-}$ | 88.60                                                           | 96.64                                                            |
| [1,6,2] ( <i>mer</i> )     | $[\text{B}_6\text{Cl}_3\text{H}_3]^{2-}$ | $\text{BH}_{\text{cis}}$ 84.89 $\text{BH}_{\text{trans}}$ 88.63 | $\text{BH}_{\text{cis}}$ 97.23 $\text{BH}_{\text{trans}}$ 96.42  |
| [1,2,3,4] ( <i>cis</i> )   | $[\text{B}_6\text{Cl}_4\text{H}_2]^{2-}$ | 92.54                                                           | 95.67                                                            |
| [1,6,2,4] ( <i>trans</i> ) | $[\text{B}_6\text{Cl}_4\text{H}_2]^{2-}$ | 88.43                                                           | 91.71                                                            |
| [1,2,3,4,6]                | $[\text{B}_6\text{Cl}_5\text{H}]^{2-}$   | 95.65                                                           | 89.27                                                            |

**Table S9.** M06-computed geometric (distances  $r_{(X-Y)}$  in Å, angles in degrees) parameters of hydrogen-bonded complexes of  $[B_6H_{(6-x)}Cl_x]^{2-}$  ( $n = 0-5$ ) with HCl (**INT<sup>HB</sup>**), their energy formation energy ( $\Delta G_f^{\circ MeCN}$  and  $\Delta H_f^{\circ MeCN}$  in kcal/mol), electron densities at the  $H \cdots B(B_2)$  bond (+3;-1) critical point ( $\rho_c$  in au), Laplacian of electron density at critical point ( $\nabla^2 \rho_c$  in au), bond ellipticity ( $\epsilon$ ) and energy of  $H \cdots B(B_2)$  interaction ( $E_{H \cdots B(B_2)} = 0.5 \cdot V(r)$  [1, 2] in kcal/mol) and donation energy ( $E_{HB}^2$  in kcal/mol) from  $\sigma(B-B)$  to  $\sigma^*(H-Cl)$  estimated from 2nd-order perturbative analysis of donor acceptor interactions within natural-bond orbital (NBO) analysis.

| N                          | INT <sup>HB3</sup>             | TS <sup>PT</sup> | TS <sup>ISO</sup><br>fac-apx | TS <sup>ISO</sup><br>fac-fac* | $r_{(H \cdots B_3)}$ | $r_{(XH)}$ | $\Delta r_{(XH)}$ | $\angle_{XH \cdots B_3}$ | $\Delta G_f^{\circ MeCN}$ | $\Delta H_f^{\circ MeCN}$ | $\rho_c$ | $\nabla^2 \rho_c$ | $\epsilon$ | $E_{H \cdots B(B_2)}$ | $E_{HB}^2$ |
|----------------------------|--------------------------------|------------------|------------------------------|-------------------------------|----------------------|------------|-------------------|--------------------------|---------------------------|---------------------------|----------|-------------------|------------|-----------------------|------------|
|                            | $[B_6H_6]^{2-} \cdots HCl$     | 0.7              | 20.1                         | 17.3                          | 2.006                | 1.339      | 0.045             | 180                      | 1.8                       | -6.9                      | 0.026    | 0.046             | 0.01       | -3.7                  | 9.77       |
| [1]                        | $[B_6ClH_5]^{2-} \cdots HCl$   | 1.3/2.3          | 19.8/19.0                    | 14.7/14.2                     | 2.021                | 1.336      | 0.042             | 179                      | 1.9                       | -6.7                      | 0.026    | 0.046             | 0.03       | -3.6                  | 9.29       |
| [1,2] ( <i>cis</i> )       | $B_6Cl_2H_4]^{2-} \cdots HCl$  | 2.1/2.2          | 19.4/17.9                    | 11.6                          | 2.037                | 1.333      | 0.039             | 179                      | 2.1                       | -6.4                      | 0.025    | 0.046             | 0.01       | -3.4                  | 9.14       |
| [1,6] ( <i>trans</i> )     | $[B_6Cl_2H_4]^{2-} \cdots HCl$ | 3.6              | 16.7                         | 14.2                          | 2.112                | 1.326      | 0.032             | 179                      | 2.6                       | -6.0                      | 0.022    | 0.044             | 0.30       | -3.0                  | 8.52       |
| [1,2,3] ( <i>fac</i> )     | $[B_6Cl_3H_3]^{2-} \cdots HCl$ | 2.1              | 17.4                         | 13.3                          | 2.058                | 1.330      | 0.036             | 179                      | 2.2                       | -6.1                      | 0.024    | 0.045             | 0.04       | -3.2                  | 8.81       |
| [1,6,2] ( <i>mer</i> )     | $[B_6Cl_3H_3]^{2-} \cdots HCl$ | 3.9/4.2          | 16.0/15.0                    | 10.6                          | 2.121                | 1.325      | 0.031             | 178                      | 2.6                       | -5.9                      | 0.022    | 0.044             | 0.32       | -3.0                  | 8.41       |
| [1,2,3,4] ( <i>cis</i> )   | $[B_6Cl_4H_2]^{2-} \cdots HCl$ | 4.8              | 13.8                         | 10.4                          | 2.133                | 1.323      | 0.029             | 178                      | 2.7                       | -5.8                      | 0.021    | 0.043             | 0.33       | -2.9                  | 8.23       |
| [1,6,2,4] ( <i>trans</i> ) | $[B_6Cl_4H_2]^{2-} \cdots HCl$ | 7.2              | –                            | 9.5                           | 2.235                | 1.316      | 0.022             | 179                      | 2.7                       | -5.5                      | 0.018    | 0.040             | 0.55       | -2.4                  | 7.56       |
| [1,2,3,4,6]                | $[B_6Cl_5H]^{2-} \cdots HCl$   | 8.0              | –                            | 7.9                           | 2.234                | 1.315      | 0.021             | 178                      | 2.7                       | -5.5                      | 0.018    | 0.039             | 0.52       | -2.4                  | 7.49       |

**Table S10.** M06-computed geometric (distances  $r_{(X-Y)}$  in Å, angles in degrees) parameters of hydrogen bonded complexes of  $Cl^- \cdot [^{fac}HB_6H_{(6-x)}Cl_x]^-$  ( $x = 0-5$ ) with HCl, their energy formation energy ( $\Delta G_f^{\circ MeCN}$  and  $\Delta H_f^{\circ MeCN}$  in kcal/mol), electron densities at the  $H \cdots B(B_2)$  bond (+3;-1) critical point ( $\rho_c$  in au), Laplacian of electron density at critical point ( $\nabla^2 \rho_c$  in au), bond ellipticity ( $\epsilon$ ) and energy of  $H \cdots B(B_2)$  interaction ( $E_{H \cdots B(B_2)} = 0.5 \cdot V(r)$  [1, 2] in kcal/mol).

| N                          | HB3 complex                                      | TS <sup>PT</sup> <sub>2nd</sub> | TS <sup>PT</sup> <sub>2nd(rev)</sub> | $r_{(H \cdots B_3)}$ | $r_{(XH)}$ | $\Delta r_{(XH)}$ | $\angle_{XH \cdots B_3}$ | $\Delta G_f^{\circ MeCN}$ | $\Delta H_f^{\circ MeCN}$ | $\rho_c$ | $\nabla^2 \rho_c$ | $\epsilon$ | $E_{H \cdots B(B_2)}$ |
|----------------------------|--------------------------------------------------|---------------------------------|--------------------------------------|----------------------|------------|-------------------|--------------------------|---------------------------|---------------------------|----------|-------------------|------------|-----------------------|
|                            | $Cl^- \cdot [^{fac}HB_6H_6]^- \cdots HCl$        | 9.5                             | 3.8                                  | 2.122                | 1.314      | 0.390             | 180                      | 3.9                       | -4.1                      | 0.020    | 0.044             | 0.01       | -2.7                  |
| [1] ( <i>cis</i> )         | $Cl^- \cdot [^{fac}HB_6ClH_5]^- \cdots HCl$      | 11.1                            | 2.8                                  | 2.143                | 1.312      | 0.388             | 178                      | 7.0                       | -1.2                      | 0.019    | 0.043             | 0.03       | -2.6                  |
| [1] ( <i>trans</i> )       | $Cl^- \cdot [^{fac}HB_6ClH_5]^- \cdots HCl$      | 13.3                            | 2.3                                  | 2.219                | 1.308      | 0.384             | 179                      | 4.2                       | -3.8                      | 0.017    | 0.040             | 0.29       | -2.3                  |
| [1,2] ( <i>fac</i> )       | $Cl^- \cdot [^{fac}HB_6Cl_2H_4]^{2-} \cdots HCl$ | 15.0                            | 1.4                                  | 2.228                | 1.307      | 0.383             | 177                      | 6.7                       | -3.6                      | 0.017    | 0.039             | 0.34       | -2.2                  |
| [1,2] ( <i>mer</i> )       | $Cl^- \cdot [^{fac}HB_6Cl_2H_4]^{2-} \cdots HCl$ | 14.6                            | 1.1                                  | 2.235                | 1.307      | 0.383             | 176                      | 6.9                       | -3.5                      | 0.017    | 0.040             | 0.33       | -2.2                  |
| [1,6] ( <i>mer</i> )       | $Cl^- \cdot [^{fac}HB_6Cl_2H_4]^{2-} \cdots HCl$ | 15.3                            | 1.4                                  | 2.229                | 1.307      | 0.383             | 179                      | 3.9                       | -3.6                      | 0.017    | 0.039             | 0.25       | -2.2                  |
| [1,2,3] ( <i>cis</i> )     | $Cl^- \cdot [^{fac}HB_6Cl_3H_3]^{2-} \cdots HCl$ | 18.9                            | 0.0                                  | 2.362                | 1.303      | 0.379             | 174                      | 6.7                       | -3.1                      | 0.014    | 0.035             | 1.08       | -1.9                  |
| [1,6,2] ( <i>trans</i> )   | $Cl^- \cdot [^{fac}HB_6Cl_3H_3]^{2-} \cdots HCl$ | 19.0                            | 0.2                                  | 2.343                | 1.302      | 0.378             | 178                      | 4.3                       | -3.2                      | 0.014    | 0.034             | 0.57       | -1.8                  |
| [1,2,3,4] ( <i>cis</i> )   | $Cl^- \cdot [^{fac}HB_6Cl_4H_2]^{2-} \cdots HCl$ | 22.8                            | 0.3                                  | 2.589                | 1.297      | 0.373             | 177                      | 5.3                       | -2.6                      | 0.008    | 0.022             | 0.10       | -1.1                  |
| [1,6,2,4] ( <i>trans</i> ) | $Cl^- \cdot [^{fac}HB_6Cl_4H_2]^{2-} \cdots HCl$ | 23.2                            | 0.4                                  | 2.351                | 1.301      | 0.377             | 179                      | 1.3                       | -6.2                      | 0.014    | 0.034             | 0.55       | -2.2                  |
| [1,2,3,4,6]                | $Cl^- \cdot [^{fac}HB_6Cl_5H]^{2-} \cdots HCl$   | 23.0                            | 0.0                                  | 2.745                | 1.296      | 0.372             | 175                      | 5.3                       | -2.5                      | 0.006    | 0.016             | 0.38       | -0.8                  |

**Table S6.** M06-computed geometric parameters (distances  $r_{(X-Y)}$  in Å, angles in °) of H<sub>2</sub> complexes of Cl<sup>-</sup>[(H<sub>2</sub>)B<sub>6</sub>H<sub>(5-x)</sub>Cl<sub>x</sub>]<sup>-</sup> ( $x = 0-5$ ) (**INT<sup>H2</sup>**), their energy formation energy ( $\Delta G_f^{\circ MeCN}$  and  $\Delta H_f^{\circ MeCN}$  in kcal/mol), electron densities in (+3;-1) donation energy ( $E^2$  in kcal/mol) from  $\sigma(B-H/Cl)$  to  $\sigma^*(H-H-B)$  ( $E_1$ ), from  $\sigma(H-H-B)$  to  $\sigma^*(B-H/Cl)$  ( $E_2$ ) and from  $p(Cl)$  to  $\sigma^*(H-H-B)$  ( $E_3$ ) estimated from 2<sup>nd</sup>-order perturbative analysis of donor acceptor interactions within natural-bond orbital (NBO) analysis.

| N                        | H <sub>2</sub> -complex                                                                        | $r(H\cdots H)$ | $r(B\cdots H1)$ | $\Delta r(B\cdots H1)$ | $r(B\cdots H_2)$ | $r(B\cdots H2)$ | $\Delta r(B\cdots H2)$ | $r(H2\cdots X)$ | $\Delta r(H2\cdots X)$ | $\Delta G_f^{\circ MeCN}$ | $\Delta H_f^{\circ MeCN}$ | $E_1$                                                  | $E_2$                     | $E_3$                | $E_{H2\cdots X}$ | $E_{H\cdots H}$ | $E_{B\cdots H}$ |
|--------------------------|------------------------------------------------------------------------------------------------|----------------|-----------------|------------------------|------------------|-----------------|------------------------|-----------------|------------------------|---------------------------|---------------------------|--------------------------------------------------------|---------------------------|----------------------|------------------|-----------------|-----------------|
| 1                        | Cl <sup>-</sup> [(H <sub>2</sub> )B <sub>6</sub> H <sub>5</sub> ] <sup>-</sup>                 | 0.910          | 1.269           | 0.069                  | 1.222            | 1.338           | 0.138                  | 2.206           | 0.912                  | 11.2                      | 3.1                       | 15.7/6.6/5.9/4.8<br>4.5/4.3/3.7<br>3.1/2.1             | 2.0<br>1.9                | 19.5<br>1.9          | -4.7             | -56.9           | -82.2           |
| [1,2 ( <i>cis</i> )      | Cl <sup>-</sup> [(H <sub>2</sub> )B <sub>6</sub> H <sub>4</sub> Cl] <sup>-</sup>               | 0.914          | 1.267           | 0.069                  | 1.221            | 1.340           | 0.142                  | 2.186           | 0.892                  | 12.8                      | 4.8                       | 10.8/8.1/7.9/5.5<br>4.3/3.4/1.3/1.2<br>1.1/1.0/0.9     | 2.4/2.3<br>2.0/0.5        | 20.6<br>2.0          | -4.9             | -56.1           | -82.4           |
| 1,6 ( <i>trans</i> )     | Cl <sup>-</sup> [(H <sub>2</sub> )B <sub>6</sub> H <sub>4</sub> Cl] <sup>-</sup>               | 0.921          | 1.260           | 0.063                  | 1.210            | 1.328           | 0.131                  | 2.203           | 0.909                  | 11.9                      | 3.7                       | 16.8/5.5/5.1<br>4.5/4.1/3.4<br>2.9/2.0/1.6             | 8.6/5.6<br>4.2/3.8<br>1.0 | 20.2<br>1.9          | -4.7             | -56.9           | -82.2           |
| 1,2,3 ( <i>fac</i> )     | Cl <sup>-</sup> [(H <sub>2</sub> )B <sub>6</sub> H <sub>3</sub> Cl <sub>2</sub> ] <sup>-</sup> | 0.918          | 1.263           | 0.067                  | 1.224            | 1.351           | 0.155                  | 2.128           | 0.834                  | 14.7                      | 6.2                       | 17.8/16.5/14.3/9.9/<br>4.7/4.5/1.9/1.7<br>1.4/0.7/0.6  | 4.8/3.0/2.9               | 26.7<br>3.1          | -5.9             | -55.3           | -82.6           |
| 1,2,6 ( <i>mer</i> )     | Cl <sup>-</sup> [(H <sub>2</sub> )B <sub>6</sub> H <sub>3</sub> Cl <sub>2</sub> ] <sup>-</sup> | 0.926          | 1.259           | 0.064                  | 1.209            | 1.330           | 0.135                  | 2.180           | 0.886                  | 13.8                      | 5.3                       | 18.5/11.1/6.4<br>6.0/3.9/0.4/0.3                       | 5.2/1.6/0.5               | 21.8<br>2.1          | -5.0             | -55.0           | -84.6           |
| 1,6,2 ( <i>mer</i> )     | Cl <sup>-</sup> [(H <sub>2</sub> )B <sub>6</sub> H <sub>3</sub> Cl <sub>2</sub> ] <sup>-</sup> | 0.919          | 1.263           | 0.067                  | 1.222            | 1.347           | 0.151                  | 2.142           | 0.848                  | 14.7                      | 6.2                       | 13.8/7.2/4.9<br>4.4/3.9/3.8<br>3.7/2.6/1.9/<br>1.7/1.3 | 3.5/2.4<br>2.1/1.8        | 25.1<br>2.5          | -5.7             | -55.4           | -82.7           |
| 1,2,3,4 ( <i>cis</i> )   | Cl <sup>-</sup> [(H <sub>2</sub> )B <sub>6</sub> H <sub>2</sub> Cl <sub>3</sub> ] <sup>-</sup> | 0.928          | 1.256           | 0.063                  | 1.214            | 1.342           | 0.149                  | 2.122           | 0.828                  | 15.5                      | 7.1                       | 30.8/8.1/<br>6.3/5.6/4.6<br>4.1/3.8/3/7                | 5.3/3.1/1.1               | 26.5<br>2.6          | -6.0             | -54.3           | -84.6           |
| 1,6,2,3 ( <i>cis</i> )   | Cl <sup>-</sup> [(H <sub>2</sub> )B <sub>6</sub> H <sub>2</sub> Cl <sub>3</sub> ] <sup>-</sup> | 0.923          | 1.259           | 0.065                  | 1.228            | 1.362           | 0.168                  | 2.073           | 0.779                  | 15.3                      | 6.9                       | 15.6/7.0/6.1<br>5.2/5.0/2.0/1.4                        | 4.1/3.7/1.6               | 33.2<br>3.3          | -7.1             | -54.3           | -83.0           |
| 1,6,2,4 ( <i>trans</i> ) | Cl <sup>-</sup> [(H <sub>2</sub> )B <sub>6</sub> H <sub>2</sub> Cl <sub>3</sub> ] <sup>-</sup> | 0.931          | 1.256           | 0.062                  | 1.211            | 1.337           | 0.143                  | 2.140           | 0.846                  | 16.2                      | 7.6                       | 18.1/6.2/5.5/3.9<br>1.3/1.0                            | 3.2/1.7/1.6<br>1.3/1.0    | 24.9<br>2.5          | -5.7             | -54.2           | -84.8           |
| 1,2,3,4,6                | Cl <sup>-</sup> [(H <sub>2</sub> )B <sub>6</sub> HCl <sub>4</sub> ] <sup>-</sup>               | 0.935          | 1.252           | 0.060                  | 1.218            | 1.355           | 0.163                  | 2.064           | 0.770                  | 16.9                      | 8.4                       | 22.1/21.0/20.1<br>19.4/17.1/12.6<br>10.1/9.7/8.3/7.5   | –                         | 40.2<br>30.1<br>5.35 | -7.3             | -53.1           | -84.8           |

**Figure S6.** M06-optimized geometries of the protonated forms  $[\text{facHB}_6\text{H}_{(6-x)}\text{Cl}_x]^-$  ( $x = 0-4$ ) and their free Gibbs formation energies ( $\Delta G_f^{\circ\text{MeCN}}$  in kcal/mol).

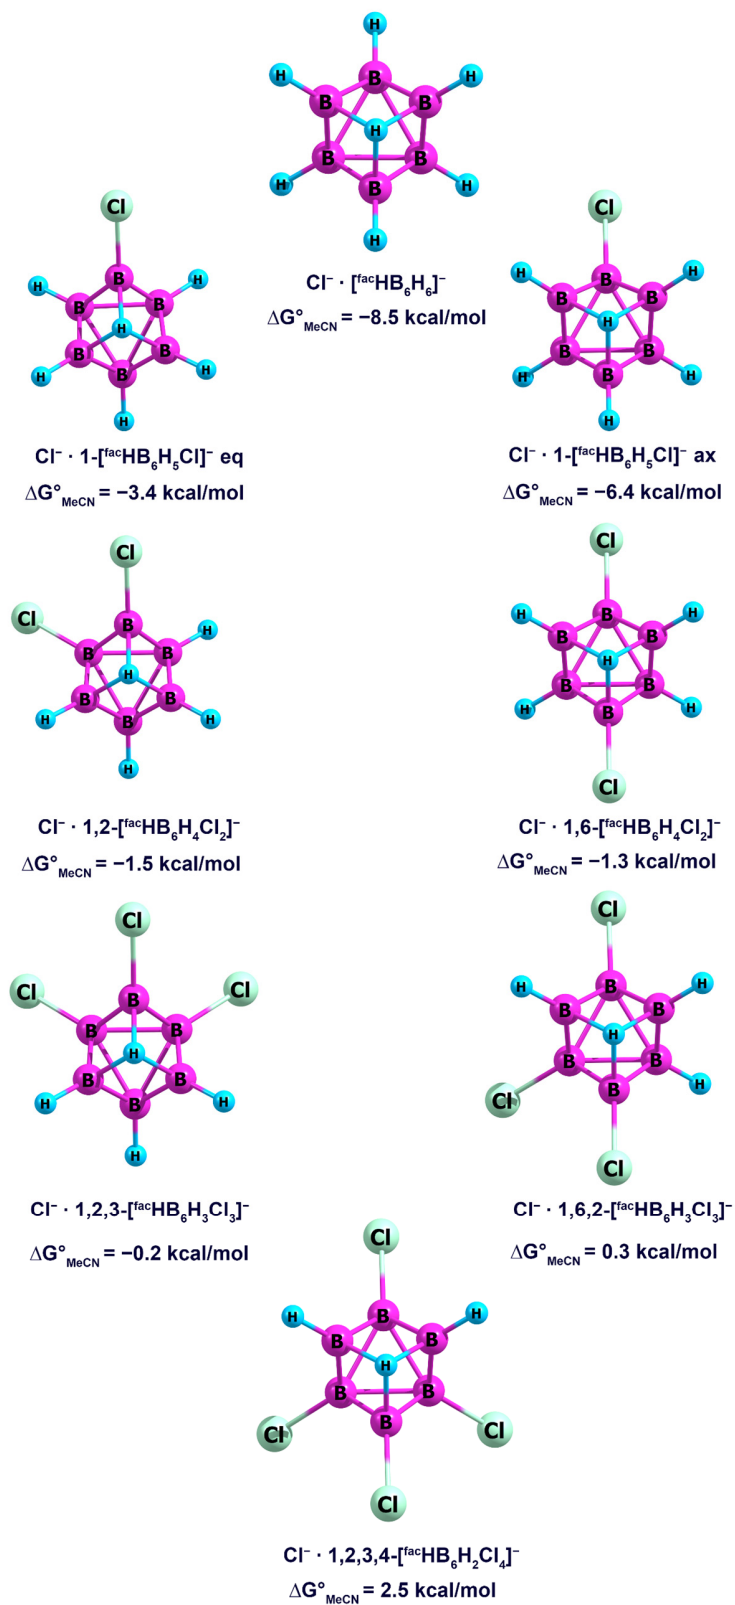

**Figure S7.** wB97XD-calculated energy profile of halogenation of  $[\text{B}_6\text{H}_{(6-x)}\text{Cl}_x]^{2-}$  ( $x = 0-5$ ) by HCl for the pathway:  $[\text{B}_6\text{H}_6]^{2-} \rightarrow 1-[\text{B}_6\text{H}_5\text{Cl}]^{2-} \rightarrow 1,2-[\text{B}_6\text{H}_4\text{Cl}_2]^{2-}$  (*cis*)  $\rightarrow 1,2,3-[\text{B}_6\text{H}_3\text{Cl}_3]^{2-}$  (*fac*)  $\rightarrow 1,2,3,4-[\text{B}_6\text{H}_2\text{Cl}_4]^{2-}$  (*cis*)  $\rightarrow 1,2,3,4,6-[\text{B}_6\text{HCl}_5]^{2-}$ .

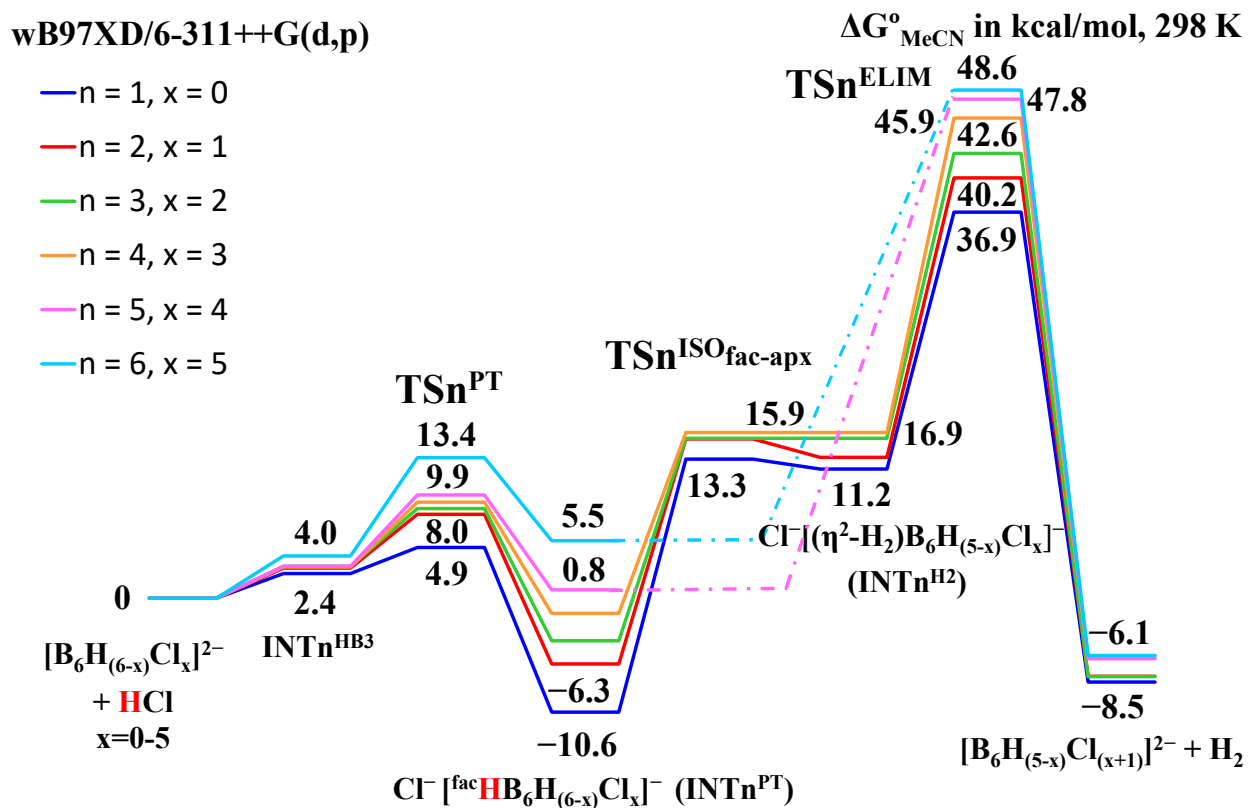

**Table S12.** Activation barriers ( $\Delta G^{\circ}_{\text{MeCN}}^{\ddagger}$ , in kcal/mol) for TSs for the reaction of  $[\text{B}_6\text{H}_6]^{2-}$  with  $\text{HCl}$  ( $\text{pK}_a^{\text{MeCN}} = 10.3$ )[42] in MeCN computed at the wB97XD/6-311++G(d,p) theory level.

| <b>n</b> | <b>N of position</b>     | $\Delta G^{\circ}_{\text{MeCN}}^{\ddagger}$<br>( <b>TSn<sup>PT</sup></b> ), <sup>a</sup> | $\Delta G^{\circ}_{\text{MeCN}}^{\ddagger}$<br>( <b>TSn<sup>ISOfac-apx</sup></b> ), <sup>b</sup> | $\Delta G^{\circ}_{\text{MeCN}}^{\ddagger}$<br>( <b>TSn<sup>ELIM</sup></b> ), <sup>c</sup> | $\Delta G^{\circ}_{\text{MeCN}}^{\ddagger}$ (span), <sup>d</sup> |
|----------|--------------------------|------------------------------------------------------------------------------------------|--------------------------------------------------------------------------------------------------|--------------------------------------------------------------------------------------------|------------------------------------------------------------------|
| 1        | <b>1</b>                 | 2.5                                                                                      | 24.2                                                                                             | 24.6                                                                                       | 47.8                                                             |
| 2        | 1,2 ( <i>cis</i> )       | 3.1                                                                                      | 21.9                                                                                             | 29.5                                                                                       | 46.5                                                             |
|          | 1,6 ( <i>trans</i> )     | 5.1                                                                                      | 21.5                                                                                             | 26.7                                                                                       | 51.2                                                             |
| 3        | 1,2,3 ( <i>fac</i> )     | 5.5                                                                                      | 19.4                                                                                             | 27.2                                                                                       | 46.6                                                             |
|          | 1,2,6 ( <i>mer</i> )     | 5.5                                                                                      | 19.1                                                                                             | 30.1                                                                                       | 48.3                                                             |
|          | 1,6,2 ( <i>mer</i> )     | 6.4                                                                                      | 19.7                                                                                             | 28.0                                                                                       | 47.7                                                             |
| 4        | 1,2,3,4 ( <i>cis</i> )   | 6.2                                                                                      | 17.3                                                                                             | 30.1                                                                                       | 47.4                                                             |
|          | 1,6,2,3 ( <i>cis</i> )   | 6.0                                                                                      | 16.9                                                                                             | 30.5                                                                                       | 47.4                                                             |
|          | 1,6,2,4 ( <i>trans</i> ) | 6.0                                                                                      | 41.8*                                                                                            |                                                                                            | 46.4                                                             |
| 5        | 1,2,3,4,6                | 6.8                                                                                      | 44.7*                                                                                            |                                                                                            | 47.8                                                             |
|          | 1,6,2,4,3                | 9.2                                                                                      | 42.3*                                                                                            |                                                                                            | 46.0                                                             |
| 6        | 1,2,3,4,6,5              | 9.4                                                                                      | 44.6*                                                                                            |                                                                                            | 48.6                                                             |

<sup>a</sup> Calculated as  $\Delta G^{\circ}_{\text{MeCN}}^{\ddagger}(\text{TSn}^{\text{PT}}) = G^{\circ}_{\text{MeCN}}(\text{TSn}^{\text{PT}}) - G^{\circ}_{\text{MeCN}}(\text{INTn}^{\text{HB3}})$ ; <sup>b</sup> Calculated as  $\Delta G^{\circ}_{\text{MeCN}}^{\ddagger}(\text{TSn}^{\text{ISOfac-apx}}) = G^{\circ}_{\text{MeCN}}(\text{TSn}^{\text{ISOfac-apx}}) - G^{\circ}_{\text{MeCN}}(\text{INTn}^{\text{PT}})$ ; <sup>c</sup> Calculated as  $\Delta G^{\circ}_{\text{MeCN}}^{\ddagger}(\text{TSn}^{\text{ELIM}}) = G^{\circ}_{\text{MeCN}}(\text{TSn}^{\text{ELIM}}) - G^{\circ}_{\text{MeCN}}(\text{INTn}^{\text{H2}})$ ; <sup>d</sup> Calculated as  $\Delta G^{\circ}_{\text{MeCN}}^{\ddagger}(\text{span}) = G^{\circ}_{\text{MeCN}}(\text{TSn}^{\text{ELIM}}) - G^{\circ}_{\text{MeCN}}(\text{INTn}^{\text{H2}})$  for  $n=1-4$  and as  $\Delta G^{\circ}_{\text{MeCN}}^{\ddagger}(\text{span}) = G^{\circ}_{\text{MeCN}}(\text{TSn}^{\text{ELIM}}) - G^{\circ}_{\text{MeCN}}([\text{B}_6\text{H}_{(6-x)}\text{Cl}_x]^{2-}) - G^{\circ}_{\text{MeCN}}(\text{HCl})$  for  $n=5-6$ ; \* **TSn<sup>CONC</sup>** for 5<sup>th</sup> and 6<sup>th</sup> halogenation steps.

## References

1. Espinosa, E.; Alkorta, I.; Rozas, I.; Elguero, J.; Molins, E., About the evaluation of the local kinetic, potential and total energy densities in closed-shell interactions. *Chem. Phys. Lett.* **2001**, 336, (5–6), 457-461.
2. Espinosa, E.; Molins, E.; Lecomte, C., Hydrogen bond strengths revealed by topological analyses of experimentally observed electron densities. *Chem. Phys. Lett.* **1998**, 285, (3–4), 170-173.
3. Grant, D. J.; Dixon, D. A.; Camaioni, D.; Potter, R. G.; Christe, K. O., Lewis Acidities and Hydride, Fluoride, and X<sup>-</sup> Affinities of the BH<sub>3-n</sub>X<sub>n</sub> Compounds for (X = F, Cl, Br, I, NH<sub>2</sub>, OH, and SH) from Coupled Cluster Theory. *Inorg. Chem.* **2009**, 48, (18), 8811-8821.
4. Golub, I. E.; Filippov, O. A.; Belkova, N. V.; Epstein, L. M.; Shubina, E. S., Hydride donating abilities of the tetracoordinated boron hydrides. *J. Organomet. Chem.* **2018**, 865, 247-256.
5. Golub, I. E.; Filippov, O. A.; Gulyaeva, E. S.; Gutsul, E. I.; Belkova, N. V., The Interplay of Proton Accepting and Hydride Donor Abilities in the Mechanism of Step-Wise Boron Hydrides Alcoholysis. *Inorg. Chim. Acta* **2017**, 456, 113-119.
